# Supplementary material for: Genomic regulation of invasion by STAT3 in triple negative breast cancer
Source: PubMed Central journal article supplement (PMC5352396; doi:10.18632/oncotarget.14153), 2016-12-24
Supplement: oncotarget-08-8226-s001.pdf [file oncotarget-08-8226-s001.pdf]

## Genomic regulation of invasion by STAT3 in triple negative breast cancer

### SUPPLEMENTARY FIGURES AND TABLES

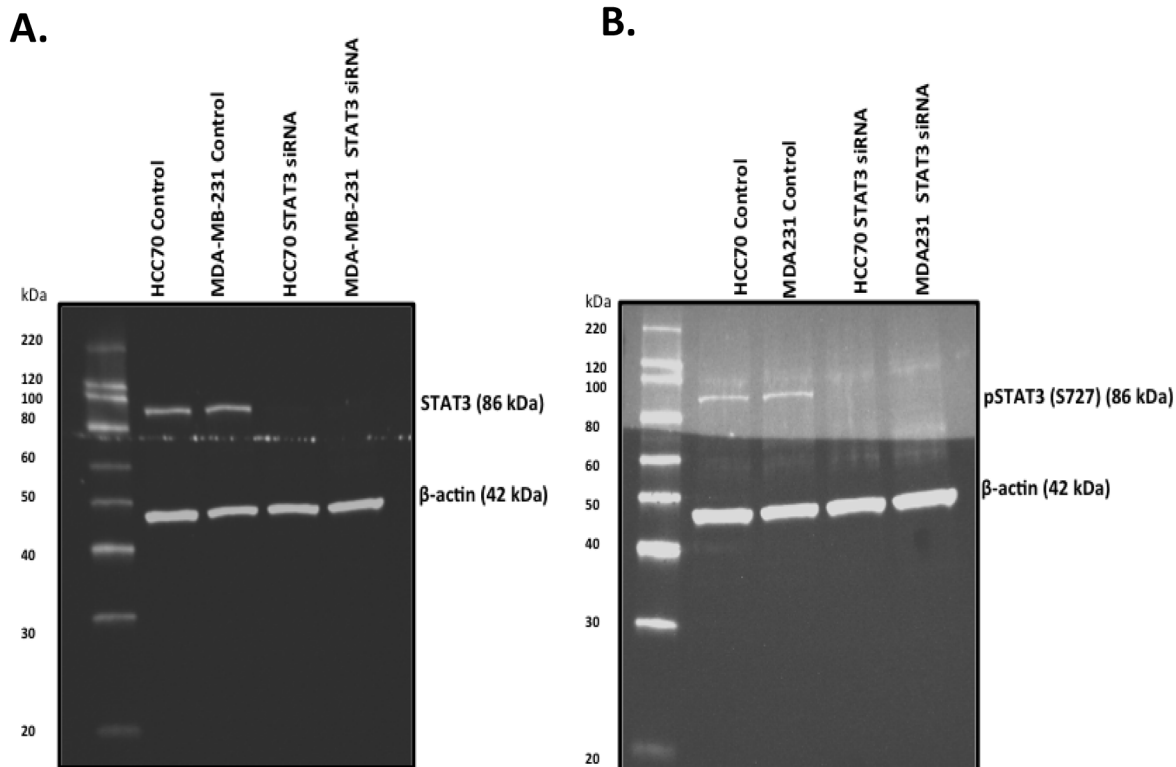

**Supplementary Figure S1: Western blot analysis reveals efficient STAT3 siRNA transfection.** **A.** HCC70 and MDA-MB-231 were transfected with STAT3 siRNA or non-targeting siRNA. Knockdown of STAT3 resulted in 97% and 95% STAT3 protein reduction in HCC70 and MDA-MB-231 respectively. **B.** Knockdown of STAT3 resulted in 70% and 60% phosphorylated STAT3 (pSTAT3) protein levels in HCC70 and MDA-MB-231 respectively.

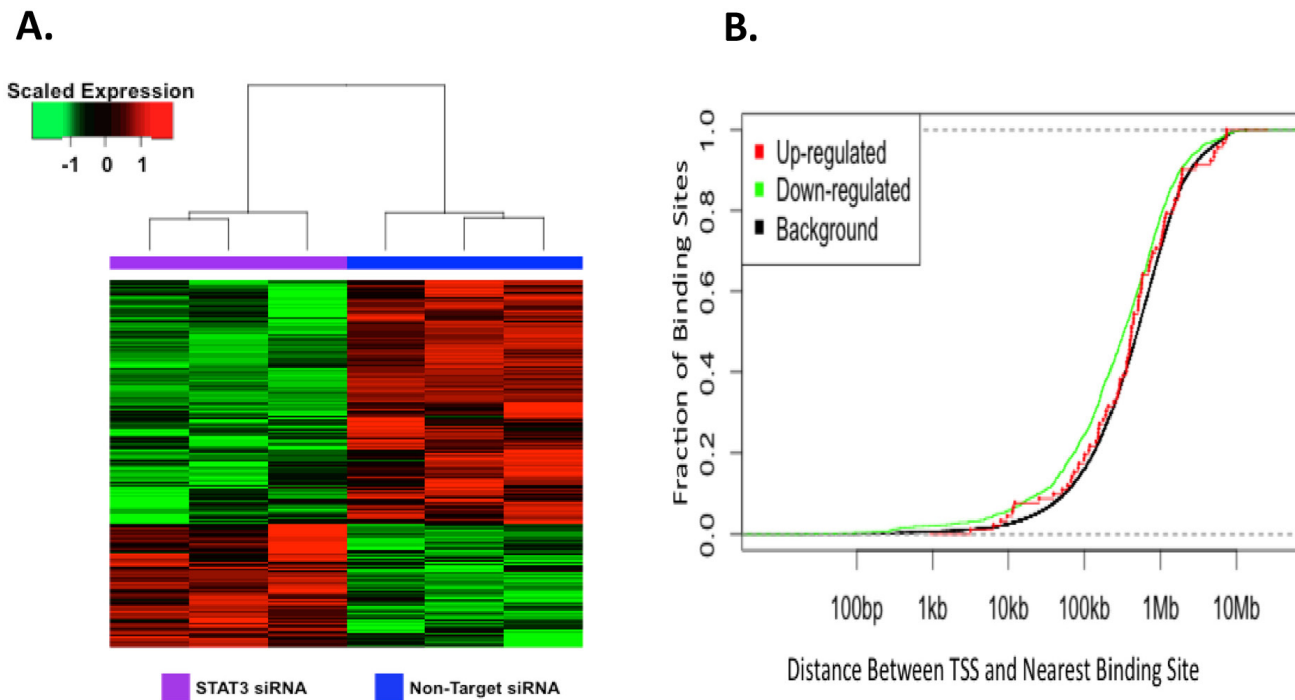

**Supplementary Figure S2: Differential expression associated with STAT3 knockdown in HCC1143.** **A.** Heatmap of differential gene expression associated with STAT3 knockdown in HCC1143. 1,732 genes were differentially expressed in response to STAT3 knockdown (> 2.0-fold differences between STAT3 siRNA treated cells and non-targeting vehicle controls). **B.** Cumulative distribution function of STAT3 binding near gene TSS in HCC1143. Genes upregulated and down-regulated upon STAT3 knockdown are significantly enriched with nearby STAT3 binding sites compared to the background genes.

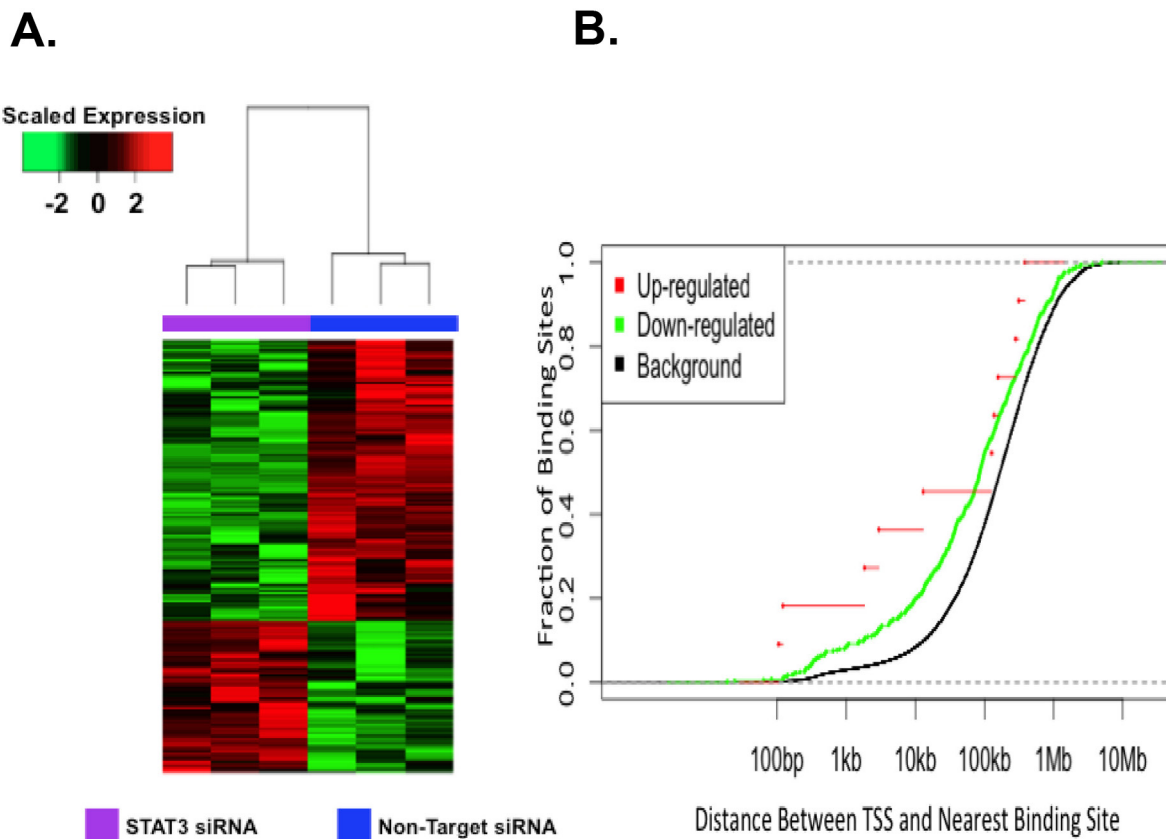

**Supplementary Figure S3: Differential expression associated with STAT3 knockdown in MDA-MB-157.** **A.** Heatmap of Differential Gene Expression Associated with STAT3 Knockdown in MDA-MB-157. 546 genes were differentially expressed in response to STAT3 knockdown (> 2.0-fold differences between STAT3 siRNA treated cells and non-targeting vehicle controls). **B.** Cumulative distribution function of STAT3 Binding Near Gene TSS in MDA-MB-157. Genes upregulated and down-regulated upon STAT3 knockdown are significantly enriched with nearby STAT3 binding sites compared to the background genes.

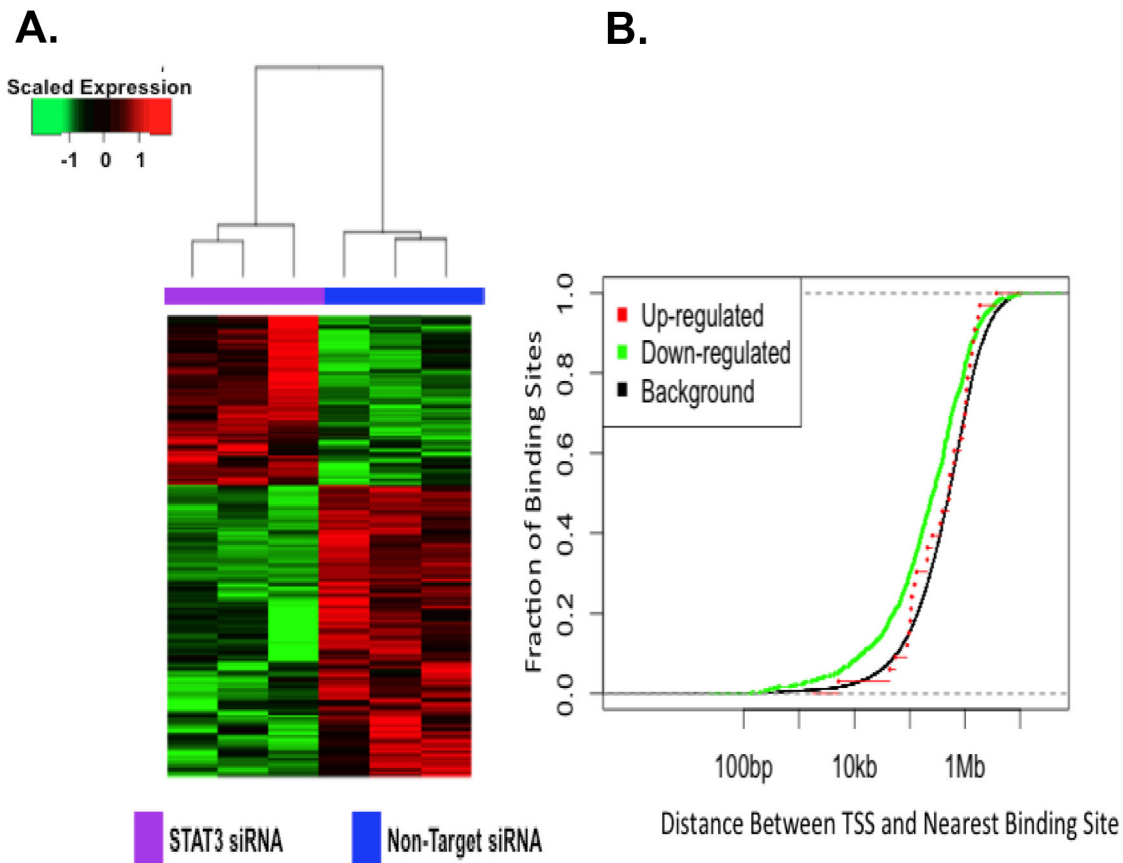

**Supplementary Figure S4: Differential expression associated with STAT3 knockdown in MDA-MB-468.** **A.** Heatmap of differential gene expression associated with STAT3 knockdown in MDA-MB-468. 854 genes were differentially expressed in response to STAT3 knockdown (> 2.0-fold differences between STAT3 siRNA treated cells and non-targeting vehicle controls). **B.** Cumulative distribution function of STAT3 binding near gene TSS in MDA-MB-468. Genes upregulated and down-regulated upon STAT3 knockdown are significantly enriched with nearby STAT3 binding sites compared to the background genes.

**Supplementary Table S1: MSigDB Perturbations Enriched Near TNBC STAT3 Binding Sites**

| <b>Enrichment</b>                                                                                                                                                                                    | <b>FDR q-value</b> |
|------------------------------------------------------------------------------------------------------------------------------------------------------------------------------------------------------|--------------------|
| Class I of genes transiently induced by EGF in 184A cells (mammary epithelium)                                                                                                                       | 0                  |
| Genes up-regulated in T34 (bladder cancer) cells in response to the photodynamic therapy (PDT) stress                                                                                                | 0                  |
| Down-regulated genes that vary between HNSCC (head and neck squamous cell carcinoma) group formed on the basis of their level of pathological differentiation: well vs poorly differentiated tumors. | 0                  |
| Genes up-regulated in HL-60 (acute promyelocytic leukemia, APL) after with the aminopeptidase inhibitor tosedostat for 24hr.                                                                         | 0                  |
| Genes up-regulated in PC3 cells (prostate cancer) after knockdown of EZH2 by RNAi.                                                                                                                   | 0                  |
| Up-regulated genes in colon carcinoma tumors compared to the matched normal mucosa samples.                                                                                                          | 0                  |
| Genes up-regulated in ME-A cells (breast cancer) undergoing apoptosis in response to doxorubicin.                                                                                                    | 0                  |
| Genes whose promoters are bound by MYC according to MYC Target Genes Database.                                                                                                                       | 0                  |
| Genes up-regulated in uveal melanoma: class 2 vs class 1 tumors.                                                                                                                                     | 0                  |
| Genes down-regulated in NB4 cells (acute promyelocytic leukemia, APL) in response to tretinoin based on ChIP-seq data.                                                                               | 0                  |
| Genes down-regulated in PC3 cells (prostate cancer) after knockdown of NIPP1 by RNAi.                                                                                                                | 0                  |
| Transcripts depleted from pseudopodia of NIH/3T3 cells (fibroblast) in response to haptotactic migratory stimulus by fibronectin, FN1.                                                               | 0                  |
| Class III of genes transiently induced by EGF in 184A1 cells (mammary epithelium).                                                                                                                   | 0                  |
| Genes with promoters bound by FOXP3 in hybridoma cells stimulated by PMA and ionomycin.                                                                                                              | 0                  |
| Genes induced under hypoxia independently of KDM3A in RCC4 cells (renal carcinoma) expressing VHL.                                                                                                   | 0                  |
| Genes up-regulated in confluent IMR90 cells (fibroblast) after knockdown of RB1 by RNAi.                                                                                                             | 0                  |
| Genes with promoters bound by both PPARG and RXRA at 8 day time point of and RXRA at 8 day time point of adipocyte differentiation of 3T3-L1 cells (preadipocyte).                                   | 0                  |
| Genes up-regulated in MC7 cells (breast cancer) after stimulation with NRG1.                                                                                                                         | 0                  |
| Genes commonly down-regulated in human alveolar rhabdomyosarcoma (ARMS) and its mouse model overexpressing PAX3-FOXO1 fusion.                                                                        | 0                  |
| Genes down-regulated in luminal-like breast cancer cell lines compared to the basal-like ones.                                                                                                       | 0                  |

STAT3 binding sites in TNBC cell lines and tumors are near genes expressed in basal-like breast cancer (enrichments determined using GREAT)

**Supplementary Table S2: Biological Processes Enriched Near TNBC STAT3 Binding Sites**

| <b>Enrichment</b>                                           | <b>FDR q-value</b>      |
|-------------------------------------------------------------|-------------------------|
| Response to Wounding                                        | 0                       |
| Cardiovascular System Development                           | 0                       |
| Regulation of Intracellular Protein Kinase Cascade          | 0                       |
| Vasculature Development                                     | 1.73x10 <sup>-280</sup> |
| Wound Healing                                               | 4.29x10 <sup>-274</sup> |
| Response to Biotic Stimulus                                 | 8.57x10 <sup>-271</sup> |
| Response to Other Organism                                  | 1.92x10 <sup>-267</sup> |
| Blood Vessel Development                                    | 5.53x10 <sup>-267</sup> |
| Response to Cytokine Stimulus                               | 3.64x10 <sup>-260</sup> |
| Cell Activation                                             | 2.64x10 <sup>-241</sup> |
| Blood Vessel Morphogenesis                                  | 1.10x10 <sup>-238</sup> |
| Regulation of Cellular Component Movement                   | 1.32x10 <sup>-234</sup> |
| Negative Regulation of Protein Metabolic Process            | 6.22x10 <sup>-232</sup> |
| Positive Regulation of Intracellular Protein Kinase Cascade | 8.35x10 <sup>-223</sup> |
| Regulation of Defense Response                              | 1.57x10 <sup>-222</sup> |
| Regulation of Cell Motility                                 | 9.00x10 <sup>-220</sup> |
| Regulation of Cell Migration                                | 2.97x10 <sup>-218</sup> |
| Regulation of Locomotion                                    | 1.20x10 <sup>-216</sup> |
| Extracellular Matrix Organization                           | 3.18x10 <sup>-208</sup> |
| Extracellular Structure Organization                        | 4.36x10 <sup>-208</sup> |

STAT3 binding sites in TNBC cell lines and tumors are near biological processes likely to promote cell migration, invasion and metastasis (enrichments determined using GREAT)

**Supplementary Table S3: Cellular Processes Enriched Near TNBC STAT3 Binding Sites**

| <b>Enrichment</b>                        | <b>FDR q-value</b>      |
|------------------------------------------|-------------------------|
| Anchoring Junction                       | 3.20x10 <sup>-175</sup> |
| Actin Cytoskeleton                       | 9.00x10 <sup>-172</sup> |
| Adherens Junction                        | 8.73x10 <sup>-163</sup> |
| Extracellular Membrane-bounded organelle | 3.40x10 <sup>-139</sup> |
| Extracellular Vesicular Exosome          | 5.24x10 <sup>-134</sup> |
| Cell-substrate Junction                  | 5.33x10 <sup>-133</sup> |
| Cell-substrate Adherens Junction         | 1.40x10 <sup>-116</sup> |
| Focal Adhesion                           | 2.67x10 <sup>-116</sup> |
| Cell Cortex                              | 1.21x10 <sup>-97</sup>  |
| Actomyosin                               | 1.32x10 <sup>-75</sup>  |
| Intermediate Filament Cytoskeleton       | 2.68x10 <sup>-71</sup>  |
| Stress Fiber                             | 5.99x10 <sup>-68</sup>  |
| Actin Filament Bundle                    | 7.76x10 <sup>-68</sup>  |
| Ruffle                                   | 7.93x10 <sup>-67</sup>  |
| Cytosolic Part                           | 3.00x10 <sup>-64</sup>  |
| Cell Cortex Part                         | 2.47x10 <sup>-62</sup>  |
| Basement Membrane                        | 3.40x10 <sup>-62</sup>  |
| Lamellipodium                            | 1.60x10 <sup>-61</sup>  |
| Melanosome                               | 3.78x10 <sup>-61</sup>  |
| Apical Junction Complex                  | 2.20x10 <sup>-57</sup>  |

STAT3 binding sites in TNBC cell lines and tumors are near cellular processes likely to promote cell migration, invasion and metastasis (enrichments determined using GREAT)

Supplementary Table S4: Genes Commonly Regulated by STAT3 in HCC70 and MDA-MB-231 Cell Lines

| Gene     | Direction of Regulation Upon STAT3 Knockdown |
|----------|----------------------------------------------|
| AIM1L    | Up-regulated                                 |
| ANKRD2   | Up-regulated                                 |
| BEAN1    | Up-regulated                                 |
| BTBD19   | Up-regulated                                 |
| C4A      | Down-regulated                               |
| C4B-AS1  | Down-regulated                               |
| CD52     | Up-regulated                                 |
| CPA4     | Up-regulated                                 |
| CPT1C    | Down-regulated                               |
| GDF15    | Up-regulated                                 |
| HLA-DMB  | Down-regulated                               |
| HMG1P36  | Up-regulated                                 |
| LCN2     | Up-regulated                                 |
| MGLL     | Up-regulated                                 |
| NANOS1   | Up-regulated                                 |
| NFE2     | Down-regulated                               |
| NNMT     | Down-regulated                               |
| SERPINA3 | Downregulated                                |
| SFTAIP   | Up-regulated                                 |
| STAT3    | Down-regulated                               |
| TXTEX1D4 | Up-regulated                                 |
| TNFSF15  | Up-regulated                                 |



**Supplementary Table S5: Top 10 GSEA enrichments of differentially expressed genes in response to 96 hour STAT3 knockdown in HCC1143**

| <b>Signatures Directly Activated by STAT3 in HCC1143<br/>(Down-regulated Upon STAT3 Knockdown)</b> | <b>FDR q-value</b> |
|----------------------------------------------------------------------------------------------------|--------------------|
| HALLMARK_KRAS_SIGNALING_UP                                                                         | 2.57E-12           |
| HALLMARK_TNFA_SIGNALING_VIA_NFKB                                                                   | 1.26E-08           |
| HALLMARK_P53_PATHWAY                                                                               | 1.38E-07           |
| NABA_MATRISOME                                                                                     | 1.38E-07           |
| HALLMARK_HYPOXIA                                                                                   | 1.47E-06           |
| HALLMARK_EPITHELIAL_MESENCHYMAL_TRANSITION                                                         | 1.21E-05           |
| HALLMARK_INFLAMMATORY_RESPONSE                                                                     | 1.21E-05           |
| HALLMARK_INTERFERON_GAMMA_RESPONSE                                                                 | 1.21E-05           |
| REACTOME_TIGHT_JUNCTION_INTERACTIONS                                                               | 1.21E-05           |
| HALLMARK_APOPTOSIS                                                                                 | 2.52E-05           |

Enrichments represent hallmark and canonical pathways in GSEA database

**Supplementary Table S6: Top 10 GSEA enrichments of differentially expressed genes in response to 96 hour STAT3 knockdown in MDA-MB-157**

| <b>Signatures Directly Activated by STAT3 in MDA-MB-157 (Down-regulated Upon STAT3 Knockdown)</b> | <b>FDR q-value</b> |
|---------------------------------------------------------------------------------------------------|--------------------|
| NABA_MATRISOME                                                                                    | 5.95E-10           |
| BIOCARTA_COMP_PATHWAY                                                                             | 2.68E-06           |
| NABA_CORE_MATRISOME                                                                               | 1.29E-05           |
| BIOCARTA_CLASSIC_PATHWAY                                                                          | 2.54E-05           |
| REACTOME_REGULATION_OF_COMPLEMENT_CASCADE                                                         | 2.54E-05           |
| KEGG_COMPLEMENT_AND_COAGULATION_CASCADES                                                          | 2.54E-05           |
| NABA_ECM_GLYCOPROTEINS                                                                            | 5.86E-05           |
| NABA_MATRISOME_ASSOCIATED                                                                         | 2.24E-04           |
| PID_INTEGRIN1_PATHWAY                                                                             | 4.04E-04           |
| REACTOME_COMPLEMENT_CASCADE                                                                       | 4.56E-04           |

Enrichments represent hallmark and canonical pathways in GSEA database

**Supplementary Table S7: Top 10 GSEA enrichments of differentially expressed genes in response to 96 hour STAT3 knockdown in MDA-MB-468**

| <b>Signatures Directly Activated by STAT3 in MDA-MB-468 (Down-regulated Upon STAT3 Knockdown)</b> | <b>FDR q-value</b> |
|---------------------------------------------------------------------------------------------------|--------------------|
| NABA_MATRISOME                                                                                    | 5.95E-10           |
| BIOCARTA_COMP_PATHWAY                                                                             | 2.68E-06           |
| NABA_CORE_MATRISOME                                                                               | 1.29E-05           |
| BIOCARTA_CLASSIC_PATHWAY                                                                          | 2.54E-05           |
| REACTOME_REGULATION_OF_COMPLEMENT_CASCADE                                                         | 2.54E-05           |
| KEGG_COMPLEMENT_AND_COAGULATION_CASCADES                                                          | 2.54E-05           |
| NABA_ECM_GLYCOPROTEINS                                                                            | 5.86E-05           |
| NABA_MATRISOME_ASSOCIATED                                                                         | 2.24E-04           |
| PID_INTEGRIN1_PATHWAY                                                                             | 4.04E-04           |
| REACTOME_COMPLEMENT_CASCADE                                                                       | 4.56E-04           |

Enrichments represent hallmark and canonical pathways in GSEA database
